# Supplementary material
Source: PubMed Central journal article supplement (PMC9258749)

**Disclosure Purpose:** 22-06711

**Summary of Interests**

I do not have any interests to disclose at this time.

**Additional Questions:**

- Are there other relationships or activities that readers could perceive to have influenced, or that give the appearance of potentially influencing, what you wrote in the submitted work?**  
No.
- What is the manuscript title?**  
Immunogenicity and Safety of Beta Adjuvanted Recombinant Booster Vaccine
- Are you the corresponding author?**  
No.

**Certification**

I certify that the information provided in this disclosure is complete and accurate.

**Disclosure Purpose:** 22-06711

**Summary of Interests**

I do not have any interests to disclose at this time.

**Additional Questions:**

- 1. **Are there other relationships or activities that readers could perceive to have influenced, or that give the appearance of potentially influencing, what you wrote in the submitted work?**  
No.
- 2. **What is the manuscript title?**  
Immunogenicity and Safety of Beta Adjuvanted Recombinant Booster Vaccine
- 3. **Are you the corresponding author?**  
No.

**Certification**

I certify that the information provided in this disclosure is complete and accurate.

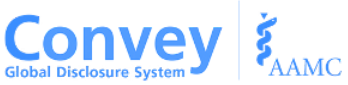

**Disclosure Purpose:** 22-06711

### Summary of Interests

I do not have any interests to disclose at this time.

### Additional Questions:

- Are there other relationships or activities that readers could perceive to have influenced, or that give the appearance of potentially influencing, what you wrote in the submitted work?**  
No.
- What is the manuscript title?**  
Immunogenicity and Safety of Beta Adjuvanted Recombinant Booster Vaccine
- Are you the corresponding author?**  
No.

### Certification

I certify that the information provided in this disclosure is complete and accurate.

**Disclosure Purpose:** 22-06711

### Summary of Interests

I do not have any interests to disclose at this time.

### Additional Questions:

- Are there other relationships or activities that readers could perceive to have influenced, or that give the appearance of potentially influencing, what you wrote in the submitted work?**  
No.
- What is the manuscript title?**  
Immunogenicity and Safety of Beta Adjuvanted Recombinant Booster Vaccine
- Are you the corresponding author?**  
No.

### Certification

I certify that the information provided in this disclosure is complete and accurate.

**Disclosure Purpose:** 22-06711

**Summary of Interests**

I do not have any interests to disclose at this time.

**Additional Questions:**

- 1. **Are there other relationships or activities that readers could perceive to have influenced, or that give the appearance of potentially influencing, what you wrote in the submitted work?**  
No.
- 2. **What is the manuscript title?**  
Immunogenicity and Safety of Beta Adjuvanted Recombinant Booster Vaccine
- 3. **Are you the corresponding author?**  
No.

**Certification**

I certify that the information provided in this disclosure is complete and accurate.

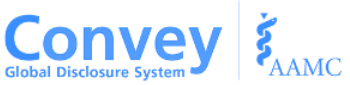

**Disclosure Purpose:** 22-06711

**Summary of Interests**

I do not have any interests to disclose at this time.

**Additional Questions:**

- 1. **Are there other relationships or activities that readers could perceive to have influenced, or that give the appearance of potentially influencing, what you wrote in the submitted work?**  
No.
- 2. **What is the manuscript title?**  
Immunogenicity and Safety of Beta Adjuvanted Recombinant Booster Vaccine
- 3. **Are you the corresponding author?**  
No.

**Certification**

I certify that the information provided in this disclosure is complete and accurate.

**Disclosure Purpose:** 22-06711

## Summary of Interests

| Company or Organization                                                                      |            |                                    |
|----------------------------------------------------------------------------------------------|------------|------------------------------------|
| Entity                                                                                       | Type       | Interest Held By                   |
| <a href="#">SANOFI PASTEUR INC.</a>                                                          | Consultant | Self                               |
| <i>Category:</i> Consultant<br><i>Additional Information:</i> Payment made to my institution |            | <i>Description:</i> Advisory board |

## Additional Questions:

- Are there other relationships or activities that readers could perceive to have influenced, or that give the appearance of potentially influencing, what you wrote in the submitted work?**  
No.
- What is the manuscript title?**  
Immunogenicity and Safety of Beta Adjuvanted Recombinant Booster Vaccine
- Are you the corresponding author?**  
No.

## Certification

I certify that the information provided in this disclosure is complete and accurate.

**Disclosure Purpose:** 22-06711

### Summary of Interests

I do not have any interests to disclose at this time.

### Additional Questions:

- Are there other relationships or activities that readers could perceive to have influenced, or that give the appearance of potentially influencing, what you wrote in the submitted work?**  
No.
- What is the manuscript title?**  
Immunogenicity and Safety of Beta Adjuvanted Recombinant Booster Vaccine
- Are you the corresponding author?**  
No.

### Certification

I certify that the information provided in this disclosure is complete and accurate.



**Disclosure Purpose:** 22-06711

### Summary of Interests

I do not have any interests to disclose at this time.

### Additional Questions:

- Are there other relationships or activities that readers could perceive to have influenced, or that give the appearance of potentially influencing, what you wrote in the submitted work?**  
No.
- What is the manuscript title?**  
Immunogenicity and Safety of Beta Adjuvanted Recombinant Booster Vaccine
- Are you the corresponding author?**  
No.

### Certification

I certify that the information provided in this disclosure is complete and accurate.

**Disclosure Purpose:** 22-06711

### Summary of Interests

I do not have any interests to disclose at this time.

### Additional Questions:

- Are there other relationships or activities that readers could perceive to have influenced, or that give the appearance of potentially influencing, what you wrote in the submitted work?**  
No.
- What is the manuscript title?**  
Immunogenicity and Safety of Beta Adjuvanted Recombinant Booster Vaccine
- Are you the corresponding author?**  
No.

### Certification

I certify that the information provided in this disclosure is complete and accurate.

**Disclosure Purpose:** 22-06711

**Summary of Interests**

I do not have any interests to disclose at this time.

**Additional Questions:**

- 1. **Are there other relationships or activities that readers could perceive to have influenced, or that give the appearance of potentially influencing, what you wrote in the submitted work?**  
No.
- 2. **What is the manuscript title?**  
Immunogenicity and Safety of Beta Adjuvanted Recombinant Booster Vaccine
- 3. **Are you the corresponding author?**  
No.

**Certification**

I certify that the information provided in this disclosure is complete and accurate.

**Disclosure Purpose:** 22-06711

### Summary of Interests

I do not have any interests to disclose at this time.

### Additional Questions:

- Are there other relationships or activities that readers could perceive to have influenced, or that give the appearance of potentially influencing, what you wrote in the submitted work?**  
No.
- What is the manuscript title?**  
22-06711 - Immunogenicity and Safety of Beta Adjuvanted Recombinant Booster Vaccine
- Are you the corresponding author?**  
No.

### Certification

I certify that the information provided in this disclosure is complete and accurate.

**Disclosure Purpose:** 22-06711

### Summary of Interests

I do not have any interests to disclose at this time.

### Additional Questions:

- Are there other relationships or activities that readers could perceive to have influenced, or that give the appearance of potentially influencing, what you wrote in the submitted work?**  
No.
- What is the manuscript title?**  
Immunogenicity and Safety of Beta Adjuvanted Recombinant Booster Vaccine
- Are you the corresponding author?**  
No.

### Certification

I certify that the information provided in this disclosure is complete and accurate.

Disclosure Purpose: 22-06711

Summary of Interests

**Company or Organization**

| Entity                                                        | Type       | Interest Held By                                   |
|---------------------------------------------------------------|------------|----------------------------------------------------|
| Amicus Therapeutics, Inc.                                     | Consultant | Self                                               |
| <i>Category:</i> Consultant<br><i>Additional Information:</i> |            | <i>Description:</i> participation in experts board |

Additional Questions:

- Are there other relationships or activities that readers could perceive to have influenced, or that give the appearance of potentially influencing, what you wrote in the submitted work?**  
No.
- What is the manuscript title?**  
Immunogenicity and Safety of Beta Adjuvanted Recombinant Booster Vaccine
- Are you the corresponding author?**  
No.

Certification

I certify that the information provided in this disclosure is complete and accurate.

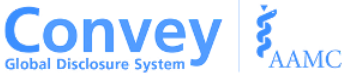

**Disclosure Purpose:** 22-06711

**Summary of Interests**

I do not have any interests to disclose at this time.

**Additional Questions:**

- 1. **Are there other relationships or activities that readers could perceive to have influenced, or that give the appearance of potentially influencing, what you wrote in the submitted work?**  
No.
- 2. **What is the manuscript title?**  
Immunogenicity and Safety of Beta Adjuvanted Recombinant Booster Vaccine
- 3. **Are you the corresponding author?**  
No.

**Certification**

I certify that the information provided in this disclosure is complete and accurate.



Disclosure Purpose: 22-06711

Summary of Interests

I do not have any interests to disclose at this time.

Additional Questions:

- 1. **Are there other relationships or activities that readers could perceive to have influenced, or that give the appearance of potentially influencing, what you wrote in the submitted work?**  
No.
- 2. **What is the manuscript title?**  
Immunogenicity and Safety of Beta Adjuvanted Recombinant Booster Vaccine
- 3. **Are you the corresponding author?**  
No.

Certification

I certify that the information provided in this disclosure is complete and accurate.





Disclosure Purpose: 22-06711

## Summary of Interests

| Company or Organization                                                            | Type  | Interest Held By                                                                              |
|------------------------------------------------------------------------------------|-------|-----------------------------------------------------------------------------------------------|
| <b>Gilead Sciences</b><br><i>Category: Other</i><br><i>Additional Information:</i> | Other | Self<br><i>Description: advisory board in HIV and Covid - investigator in clinical trials</i> |
| <b>Merck</b><br><i>Category: Other</i><br><i>Additional Information:</i>           | Other | Self<br><i>Description: advisory boards on HIV and covid investigator in clinical trials</i>  |
| <b>Moderna</b><br><i>Category: Other</i><br><i>Additional Information:</i>         | Other | Self<br><i>Description: advisory board on Covid</i>                                           |

## Additional Questions:

- Are there other relationships or activities that readers could perceive to have influenced, or that give the appearance of potentially influencing, what you wrote in the submitted work?**  
No.
- What is the manuscript title?**  
Immunogenicity and Safety of Beta Adjuvanted Recombinant Booster Vaccine
- Are you the corresponding author?**  
No.

## Certification

I certify that the information provided in this disclosure is complete and accurate.

**Disclosure Purpose:** 22-06711

**Summary of Interests**

I do not have any interests to disclose at this time.

**Additional Questions:**

- 1. **Are there other relationships or activities that readers could perceive to have influenced, or that give the appearance of potentially influencing, what you wrote in the submitted work?**  
No.
- 2. **What is the manuscript title?**  
"Immunogenicity and Safety of Beta Adjuvanted Recombinant Booster Vaccine,"
- 3. **Are you the corresponding author?**  
No.

**Certification**

I certify that the information provided in this disclosure is complete and accurate.



Disclosure Purpose: 22-06711

## Summary of Interests

### Company or Organization

| Entity                                                                                                              | Type                       | Interest Held By                             |
|---------------------------------------------------------------------------------------------------------------------|----------------------------|----------------------------------------------|
| <a href="#">bioMerieux</a>                                                                                          | Other                      | Self                                         |
| <i>Category:</i> Other<br><i>Additional Information:</i> Supervisor approval                                        |                            | <i>Description:</i> Meeting chair            |
| <a href="#">GlaxoSmithKline</a>                                                                                     | Consultant                 | Self                                         |
| <i>Category:</i> Consultant<br><i>Additional Information:</i> Supervisor approval 250 euros hourly rate             |                            | <i>Description:</i> Board                    |
| <a href="#">Merck Sharp and Dohme</a>                                                                               | Other                      | Self                                         |
| <i>Category:</i> Other<br><i>Additional Information:</i> Supervisor approval                                        |                            | <i>Description:</i> Educational presentation |
| <a href="#">Novartis</a>                                                                                            | Other                      | Self                                         |
| <i>Category:</i> Other<br><i>Additional Information:</i>                                                            |                            | <i>Description:</i> Educational meeting      |
| <a href="#">Pfizer Inc.</a>                                                                                         | Consultant                 | Self                                         |
| <i>Category:</i> Consultant<br><i>Additional Information:</i>                                                       |                            | <i>Description:</i>                          |
| <a href="#">Sanofi</a>                                                                                              | Data And Safety Monitoring | Self                                         |
| <i>Category:</i> Data And Safety Monitoring<br><i>Additional Information:</i> Superviso approval 250 euros per hour |                            | <i>Description:</i> Pneumococcal vaccine     |
| <a href="#">Sanofi</a>                                                                                              | Consultant                 | Self                                         |
| <i>Category:</i> Consultant<br><i>Additional Information:</i> Superviso approval Horuly rate                        |                            | <i>Description:</i> DSMB participation       |

## Additional Questions:

1. **Are there other relationships or activities that readers could perceive to have influenced, or that give the appearance of potentially influencing, what you wrote in the submitted work?**

No.

2. **What is the manuscript title?**

Immunogenicity and Safety of Beta Adjuvanted Recombinant Booster Vaccine

3. **Are you the corresponding author?**

Yes.

a. **Please list the other authors' names here.**

Tabassome Simon Xavier de Lamballerie Eric Tartour, Marine Cachanado Liem B Luong Nguyen Laetitia Ninove Marie Lachâtre Inès Ben Ghezala Marc Bardou Catherine Schmidt-Mutter Karine Lacombe Fabrice Laine Jean-Sébastien Allain Elisabeth Botelho-Nevers Marie-Pierre Tavalacci Christian Chidiac atricia Pavese Bertrand Dussol, Stéphane Priet Dominique Deplanque Amel Touati Laureen Curci Eleine Konate Nadine Ben Hamouda Anissa Besbes Eunice Nubret Florence Capelle Laurence Berard Alexandra Rousseau

## Certification

I certify that the information provided in this disclosure is complete and accurate.

Disclosure Purpose: 22-06711

Summary of Interests

**Company or Organization**

| Entity                                                                             | Type       | Interest Held By                                                                       |
|------------------------------------------------------------------------------------|------------|----------------------------------------------------------------------------------------|
| Pfizer                                                                             | Consultant | Self                                                                                   |
| <i>Category:</i> Consultant<br><i>Additional Information:</i> ended in August 2021 |            | <i>Description:</i> review cost-effectiveness report on pneumococcal vaccine in France |
| Pfizer                                                                             | Travel     | Self                                                                                   |
| <i>Location(s):</i> Poitiers<br><i>Additional Information:</i>                     |            | <i>Purpose:</i> French Infectious disease conference                                   |
| Pfizer                                                                             | Travel     | Self                                                                                   |
| <i>Location(s):</i> Lisbon, Portugal<br><i>Additional Information:</i>             |            | <i>Purpose:</i> European Conference on Infectious Diseases                             |

Additional Questions:

- Are there other relationships or activities that readers could perceive to have influenced, or that give the appearance of potentially influencing, what you wrote in the submitted work?**  
No.
- What is the manuscript title?**  
Immunogenicity and Safety of Beta Adjuvanted Recombinant Booster Vaccine
- Are you the corresponding author?**  
No.

Certification

I certify that the information provided in this disclosure is complete and accurate.

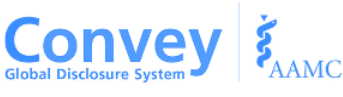

**Disclosure Purpose:** 22-06711

**Summary of Interests**

I do not have any interests to disclose at this time.

**Additional Questions:**

- 1. **Are there other relationships or activities that readers could perceive to have influenced, or that give the appearance of potentially influencing, what you wrote in the submitted work?**  
No.
- 2. **What is the manuscript title?**  
Immunogenicity and Safety of Beta Adjuvanted Recombinant Booster Vaccine
- 3. **Are you the corresponding author?**  
No.

**Certification**

I certify that the information provided in this disclosure is complete and accurate.



**Disclosure Purpose:** 22-06711

### Summary of Interests

I do not have any interests to disclose at this time.

### Additional Questions:

- Are there other relationships or activities that readers could perceive to have influenced, or that give the appearance of potentially influencing, what you wrote in the submitted work?**  
No.
- What is the manuscript title?**  
Immunogenicity and Safety of Beta Adjuvanted Recombinant Booster Vaccine
- Are you the corresponding author?**  
No.

### Certification

I certify that the information provided in this disclosure is complete and accurate.

**Disclosure Purpose:** 22-06711

**Summary of Interests**

I do not have any interests to disclose at this time.

**Additional Questions:**

- 1. **Are there other relationships or activities that readers could perceive to have influenced, or that give the appearance of potentially influencing, what you wrote in the submitted work?**  
No.
- 2. **What is the manuscript title?**  
Immunogenicity and Safety of Beta Adjuvanted Recombinant Booster Vaccine
- 3. **Are you the corresponding author?**  
No.

**Certification**

I certify that the information provided in this disclosure is complete and accurate.

**Disclosure Purpose:** 22-06711

**Summary of Interests**

I do not have any interests to disclose at this time.

**Additional Questions:**

- 1. **Are there other relationships or activities that readers could perceive to have influenced, or that give the appearance of potentially influencing, what you wrote in the submitted work?**  
No.
- 2. **What is the manuscript title?**  
Immunogenicity and Safety of Beta Adjuvanted Recombinant Booster Vaccine
- 3. **Are you the corresponding author?**  
No.

**Certification**

I certify that the information provided in this disclosure is complete and accurate.





**Disclosure Purpose:** 22-06711

**Summary of Interests**

I do not have any interests to disclose at this time.

**Additional Questions:**

- 1. **Are there other relationships or activities that readers could perceive to have influenced, or that give the appearance of potentially influencing, what you wrote in the submitted work?**  
No.
- 2. **What is the manuscript title?**  
Immunogenicity and Safety of Beta Adjuvanted Recombinant Booster Vaccine
- 3. **Are you the corresponding author?**  
No.

**Certification**

I certify that the information provided in this disclosure is complete and accurate.

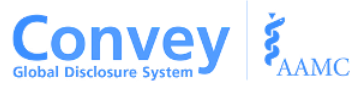

**Disclosure Purpose:** 22-06711

### Summary of Interests

I do not have any interests to disclose at this time.

### Additional Questions:

- Are there other relationships or activities that readers could perceive to have influenced, or that give the appearance of potentially influencing, what you wrote in the submitted work?**  
No.
- What is the manuscript title?**  
Immunogenicity and safety of beta adjuvanted booster vaccine
- Are you the corresponding author?**  
No.

### Certification

I certify that the information provided in this disclosure is complete and accurate.

Disclosure Purpose: 22-06711

## Summary of Interests

| Company or Organization                                                 | Type       | Interest Held By                   |
|-------------------------------------------------------------------------|------------|------------------------------------|
| <b>AstraZeneca</b>                                                      | Other      | Self                               |
| <i>Category:</i> Other<br><i>Additional Information:</i> advisory Board |            | <i>Description:</i> Advisory Board |
| <b>Bayer</b>                                                            | Other      | Self                               |
| <i>Category:</i> Other<br><i>Additional Information:</i> Advisory Board |            | <i>Description:</i> Advisory Board |
| <b>Novartis</b>                                                         | Consultant | Self                               |
| <i>Category:</i> Consultant<br><i>Additional Information:</i>           |            | <i>Description:</i>                |
| <b>Sanofi</b>                                                           | Consultant | Self                               |
| <i>Category:</i> Consultant<br><i>Additional Information:</i>           |            | <i>Description:</i>                |

## Additional Questions:

- Are there other relationships or activities that readers could perceive to have influenced, or that give the appearance of potentially influencing, what you wrote in the submitted work?**  
No.
- What is the manuscript title?**  
Immunogenicity and Safety of Beta Adjuvanted Recombinant Booster Vaccine
- Are you the corresponding author?**  
No.

## Certification

I certify that the information provided in this disclosure is complete and accurate.

Disclosure Purpose: 22-06711

Summary of Interests

**Company or Organization**

| Entity                                                                                                                                                                                                                      | Type             | Interest Held By                                                                |
|-----------------------------------------------------------------------------------------------------------------------------------------------------------------------------------------------------------------------------|------------------|---------------------------------------------------------------------------------|
| <a href="#">OSE ImmunoTherapeutics</a>                                                                                                                                                                                      | Grant / Contract | Other - No personal interest for this company                                   |
| <i>Recipient Name:</i> Eric Tartour<br><i>Grant / Contract Description:</i> Grant to monitor vaccine against Covid and Cancer<br><i>Additional Information:</i> My laboratory receive a grant for my laboratory of research |                  | <i>Recipient Type:</i> Institution<br><i>Grant / Contract Purpose:</i> Research |

Additional Questions:

- Are there other relationships or activities that readers could perceive to have influenced, or that give the appearance of potentially influencing, what you wrote in the submitted work?**  
No.
- What is the manuscript title?**  
Immunogenicity and Safety of Beta Adjuvanted Recombinant Booster Vaccine
- Are you the corresponding author?**  
No.

Certification

I certify that the information provided in this disclosure is complete and accurate.

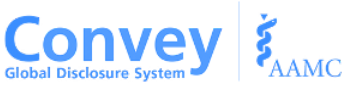

**Disclosure Purpose:** 22-06711

### Summary of Interests

I do not have any interests to disclose at this time.

### Additional Questions:

- Are there other relationships or activities that readers could perceive to have influenced, or that give the appearance of potentially influencing, what you wrote in the submitted work?**  
No.
- What is the manuscript title?**  
Immunogenicity and Safety of Beta Adjuvanted Recombinant Booster Vaccine
- Are you the corresponding author?**  
No.

### Certification

I certify that the information provided in this disclosure is complete and accurate.

**Disclosure Purpose:** 22-06711

**Summary of Interests**

I do not have any interests to disclose at this time.

**Additional Questions:**

- 1. **Are there other relationships or activities that readers could perceive to have influenced, or that give the appearance of potentially influencing, what you wrote in the submitted work?**  
No.
- 2. **What is the manuscript title?**  
Immunogenicity and Safety of Beta Adjuvanted Recombinant Booster Vaccine
- 3. **Are you the corresponding author?**  
No.

**Certification**

I certify that the information provided in this disclosure is complete and accurate.



Supplement: NEJMc2206711_disclosures.pdf [file NEJMc2206711_disclosures.pdf]
